# Supplementary material for: CeO2-Azacrown Conjugate as a Nanoplatform for Combined Radiopharmaceuticals
Source: MDPI journal article supplement (doi:10.3390/nano12244484), 2022-12-18
Supplement: s1 [file s1]

# **CeO<sub>2</sub>-azacrown conjugate as a nanoplatform for combined radiopharmaceuticals**

## **Supplementary Information**

*Sofia Khabirova*<sup>1,\*</sup>, *Gleb Aleshin*<sup>1</sup>, *Tatiana Plakhova*<sup>1</sup>, *Anastasia Zubenko*<sup>2</sup>, *Anna Shchukina*<sup>2</sup>, *Olga Fedorova*<sup>2</sup>, *Aleksey Averin*<sup>3</sup>, *Ekaterina Belova*<sup>1</sup>, *Elena Bazarkina*<sup>4,5</sup>, *Kristina Kvashnina*<sup>1,4,5</sup> and *Stepan Kalmykov*<sup>1</sup>

<sup>1</sup> Department of Chemistry, Lomonosov Moscow State University, Leninskie Gory, 1/3, 119991, Moscow, Russia

<sup>2</sup> N. Nesmeyanov Institute of Organoelement Compounds of Russian Academy of Sciences, Vavilova, 28, GSP-1, 119991, Moscow, Russia

<sup>3</sup> Frumkin Institute of Physical Chemistry and Electrochemistry Russian Academy of Sciences, Leninskiy Ave. 31b4, 119991, Moscow, Russia

<sup>4</sup> The Rossendorf Beamline at ESRF—The European Synchrotron, CS40220, CEDEX 9, 38043 Grenoble, France

<sup>5</sup> Helmholtz Zentrum Dresden-Rossendorf (HZDR), Institute of Resource Ecology, P.O. Box 510119, 01314 Dresden, Germany

\* Correspondence: khabirovasophia@gmail.com; Tel.: +7-9661919972

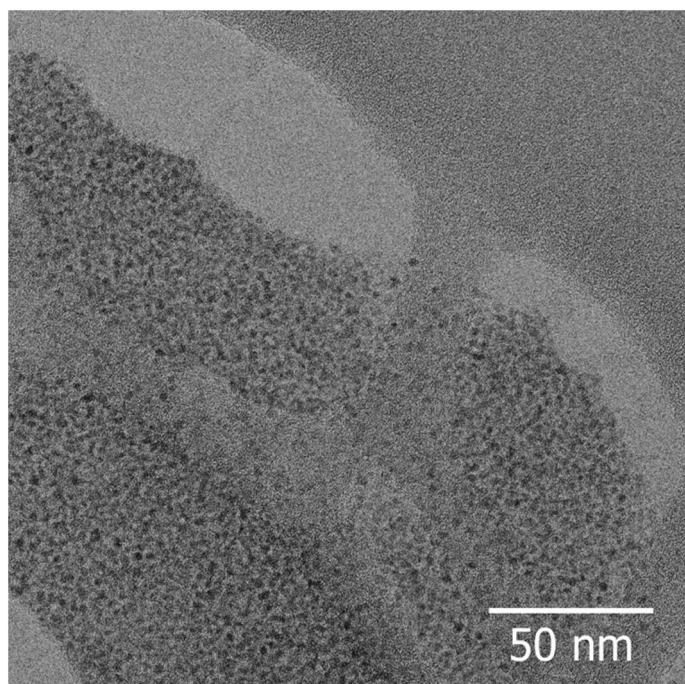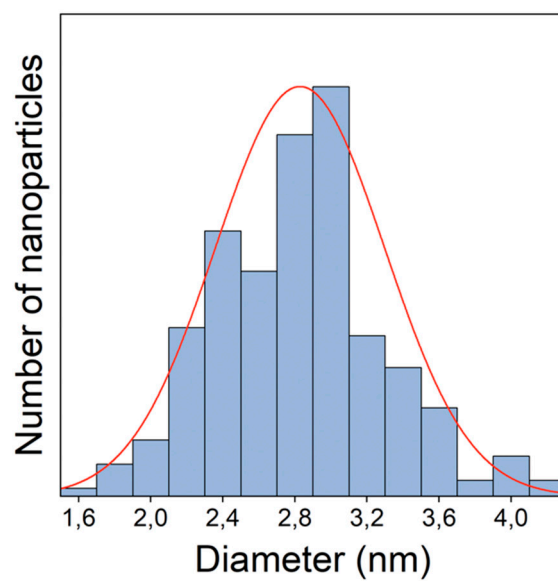

**Figure S1.** TEM image of the CeO<sub>2</sub>-ECH-L surface (scale bar = 50 nm) and CeO<sub>2</sub>-ECH-L size distribution according to TEM data.

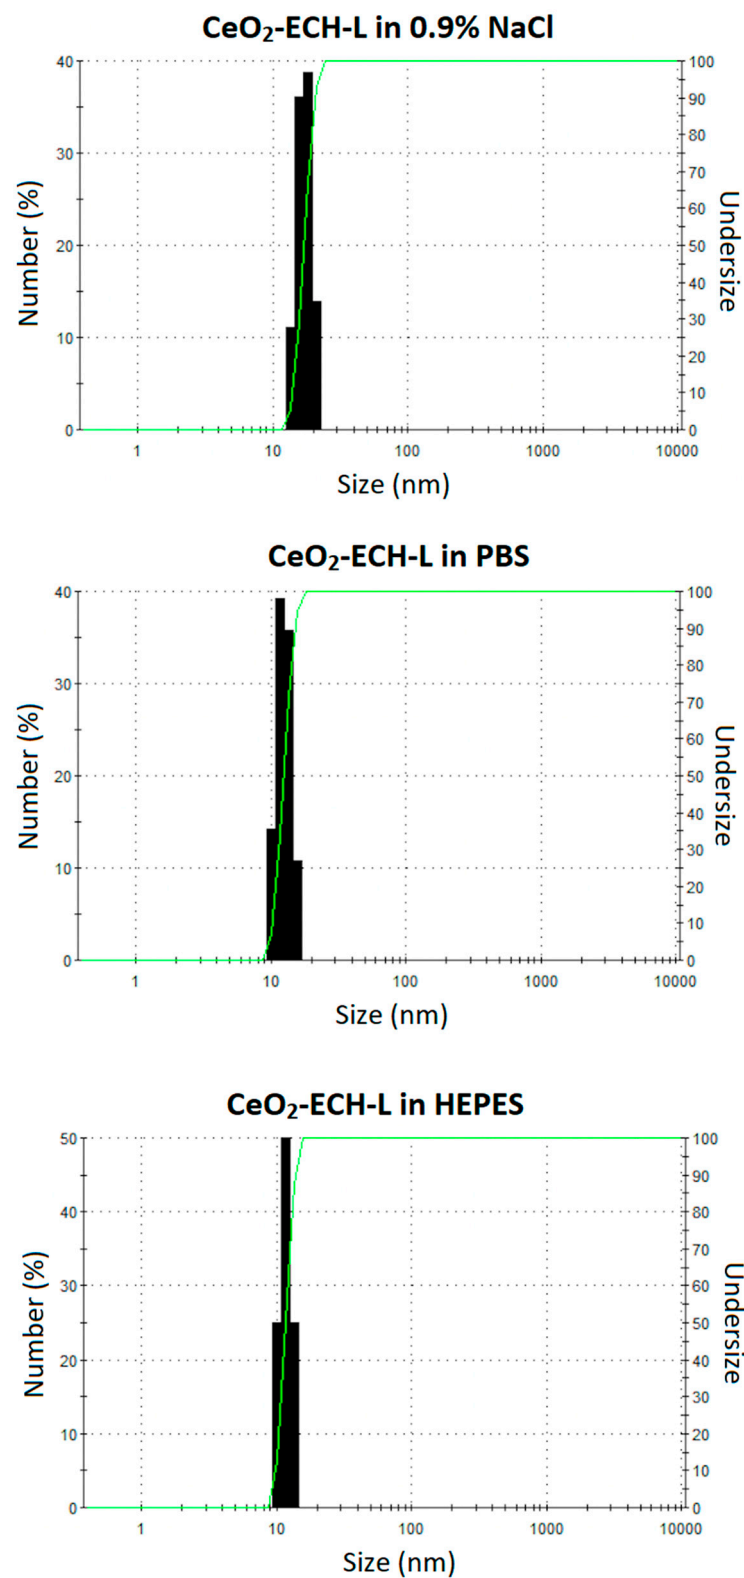

**Figure S2.** CeO<sub>2</sub>-ECH-L size distribution in the different buffer solutions according to DLS data.

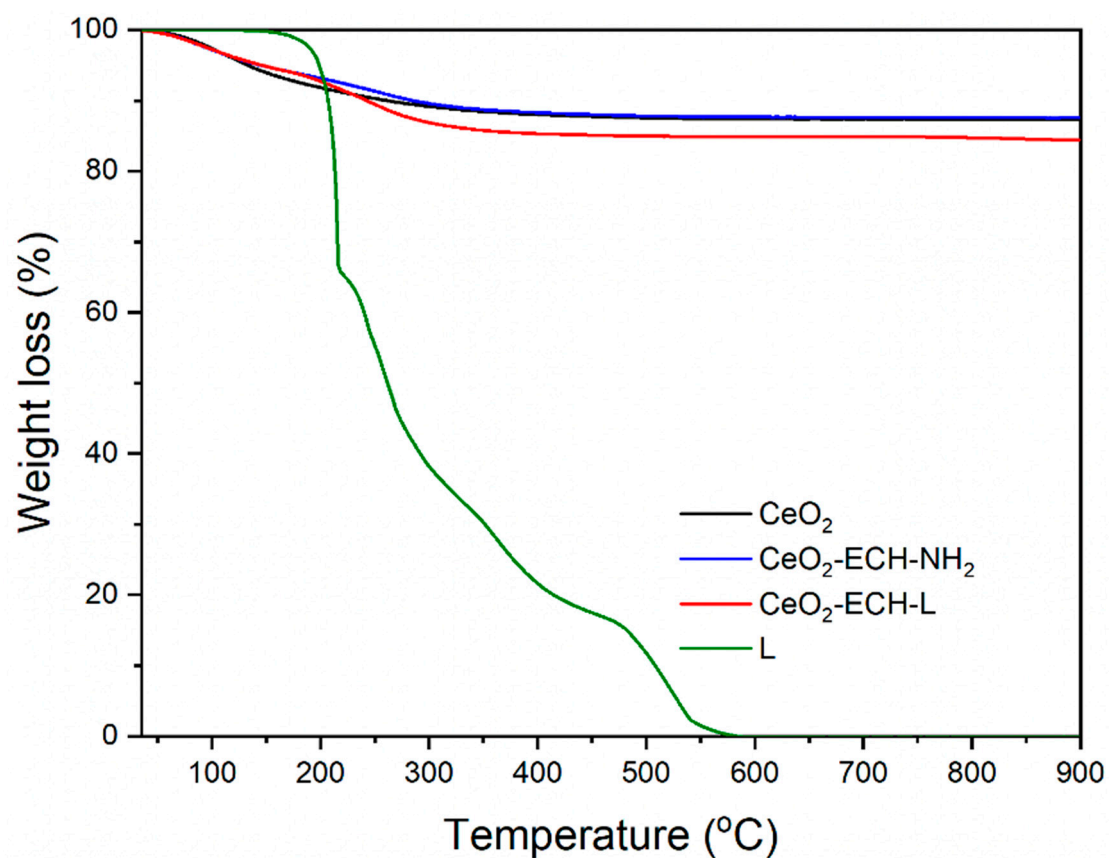

**Figure S3.** Curves obtained from thermogravimetric analysis of the CeO<sub>2</sub> and synthesized functionalized CeO<sub>2</sub> nanoparticles.

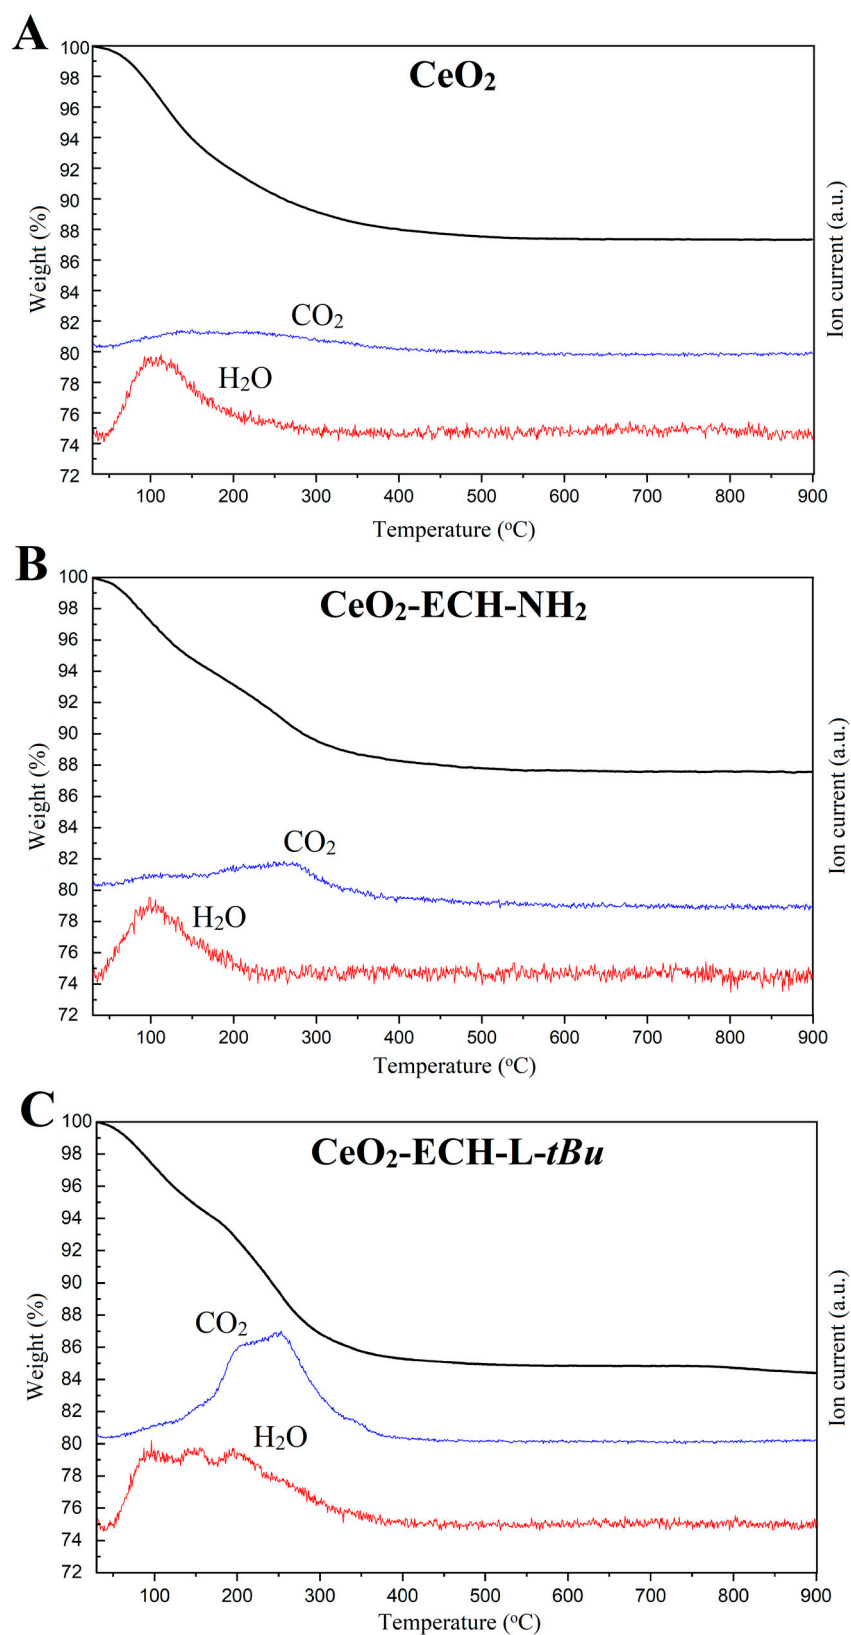

**Figure S4.** TGA-MS results of initial (A) and surface-modified  $\text{CeO}_2$  nanoparticles (B, C) obtained for the mass numbers 18 ( $\text{H}_2\text{O}$ ) and 44 ( $\text{CO}_2$ ).
